# Supplementary material for: Klotho attenuates glucocorticoid-induced osteoblast cytotoxicity via Wnt signaling pathway modulation
Source: Research Square preprint supplement (doi:10.21203/rs.3.rs-5854318/v1), 2025-04-28
Supplement: Supplementary file 1 [file 411fa144ec1c338941615194.docx]

**Table1.The primer sequences of mouse KL, Wnt5a, Wnt3a, β-catenin and Actin gene**

| Gene | Upstream primer sequence | Downstream primer sequence |
| --- | --- | --- |
| KL | 5 ^ACTTTGCTTGGGGAGTTGTT G-35 | 5 ^CCACAGATAGACATTCGGGTCA-35 |
| Wnt5a | 5^ACAGACCCAGAGAGGAGGAG-35 | 5 ^CCCCCAGTTCATTCACACCA-35 |
| Wnt3a | 5^CTGCGAACCTAACCCCGAA-35 | 5^ACAGTGGCATTTCTCCCTCC-35 |
| β-catenin | 5^GGGTCCTCTGTGAACTTGCT-35 | 5^AATCCTGTGGCTTGTCCTCA-35 |
| Actin | 5 ^GGTTGTCTCCTGCGACTTC | 5 ^TGGTCCAGGGTTTCTTACT |
|  | A-3' | CC-35 |
